# Supplementary material
Source: publisher site journal article supplement (https://www.dovepress.com/article/503757)
Supplement: Supplementary file 1 [file get_supplementary_file.php]

**Supplement Materials 1**

The names of the botanists who formally identified the plants and the references of the voucher specimens deposited in a public herbarium.

| Plant Material | Botanist | Voucher Specimen Information |
| --- | --- | --- |
| Carthamus tinctorius L. | Carl Linnaeus | PE 02084356 |
| Phyllanthus emblica L. | Carl Linnaeus | PE 02040644 |
| Swertia bimaculata (Siebold & Zucc.) Hook. f. & Thomson ex C. B. Clarke | Siebold, Zuccarini, C. B. Clarke | PE 02246265 |
| Myristica fragrans Houtt. | Martin Houttuyn | KUN 1498467 |
| Astragalus membranaceus (Fisch.) Bunge | Alexander Andreas von Bunge | KUN 1318891 |
| Dolomiaea costus (Falc.) Kasana & A.K.Pandey [Asteraceae] | Joseph Decaisne | HIB 0180963 |
| Saxifraga stolonifera Meerb. | William Curtis | PE 02062352 |
| Coriandrum sativum L. | Carl Linnaeus | PE 02026340 |
| Aquilaria sinensis (Lour.) Spreng | Joseph de Loureiro, Ernst Gilg | PE 01809627 |
| Punica granatum L. | Carl Linnaeus | PE 02031681 |
| Rhododendron anthopogonoides Maxim | Carl Johann Maximowicz | SZ 02022569 |
| Malva verticillata L. | Carl Linnaeus | PE 02233368 |
| Glycyrrhiza uralensis Fisch. | Fischer (Carl Erich von Fischer) | PE 02246344 |
